# Supplementary material for: A supertree pipeline for summarizing phylogenetic and taxonomic information for millions of species
Source: PeerJ journal article supplement (doi:10.7717/peerj.3058), 2017-03-01
Supplement: AppendixA.pdf [file AppendixA.pdf]

## A THE MAXIMUM SUM DISPLAYED GROUPS' WEIGHTED SCORES CRITERION

Let  $\mathcal{W}$  is a weighting function that maps any input tree's internal node to a non-negative number. If  $I(\mathbb{S}, i, j)$  is an indicator function that is 1 if summary tree  $\mathbb{S}$  displays the node  $V(i, j)$  and 0 otherwise then:  $SDGWS(\mathbb{S}) = \sum_i \sum_j I(\mathbb{S}, i, j) \mathcal{W}(i, j)$  is the “sum of displayed groups' weighted scores” for a tree where  $i$  indexes all of the input trees and  $j$  indexes each non-root internal node in tree  $i$ . Preference for this tree is referred to as the maximum sum displayed groups' weighted scores criterion (MSDGWS criterion). The summary tree constructed by the propinquity pipeline is a greedy heuristic for finding a tree that maximizes this score when the weights for a node are determined by the tree's weight and the difference in weighting is so large that displaying one node from a highly ranked tree is preferred to displaying all of the nodes in the trees with lower rank.
